# Supplementary material
Source: Springer Nature journal article supplement (https://www.springermedizin.de/resource/supplementary/13256_2013_2708_MOESM3_ESM.pdf/9651258)
Supplement: MOESM3 [file 9651258]

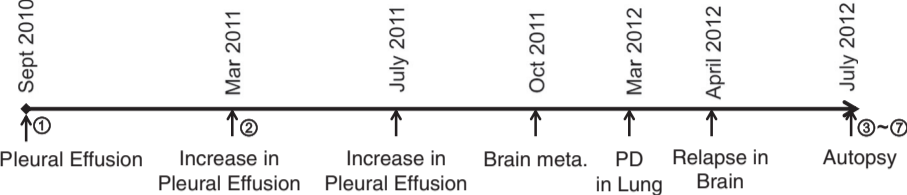

Gefitinib PD  
PR

CBDCA+PEM PD SD  
GEM PD SD  
DTX PD SD

Erlotinib PD PR  
Erlotinib PD PR  
WBRT

| EGFR mutation status | Exon 19 deletion | T790M |
|----------------------|------------------|-------|
| ① Pleural effusion   | +                | -     |
| ② Pleural effusion   | +                | +     |
| ③ Lung               | +                | +     |
| ④ Brain              | +                | -     |
| ⑤ Spinal Cord        | Poor DNA         |       |
| ⑥ Liver              | Poor DNA         |       |
| ⑦ Adrenal Gland      | Poor DNA         |       |
